# Supplementary material for: Synthesis and remarkable mechano- and thermo-hypsochromic luminescence of a new type of DPP-based derivative
Source: Royal Society of Chemistry journal article supplement (doi:10.1039/c7tc04698g), 2017-12-14
Supplement: c7tc04698g1.pdf [file c7tc04698g1.pdf]

## Synthesis and very large mechano- and thermo-hypsochromic luminescence of a new-type DPP-based derivative

Zhongwei Liu, Kai Zhang, Qikun Sun, Zhenzhen Zhang, Liangliang Tang, Shanfeng Xue, Dongmei Chen, Haichang Zhang,\* and Wenjun Yang\*

Key Laboratory of Rubber-plastics of Ministry of Education/Shandong Province (QUST), School of Polymer Science & Engineering, Qingdao University of Science & Technology, 53-Zhengzhou Road, Qingdao, 266042, P. R. China. \*E-mail: haichangzhang@hotmail.com, [ywjph2004@qust.edu.cn](mailto:ywjph2004@qust.edu.cn)

### CONTENTS

#### S1. Synthesis

#### S2. Supporting Figures

#### S3. Supporting Tables

#### Synthesis of S1 (4-(1,3-dioxolan-2-yl)benzonitrile)

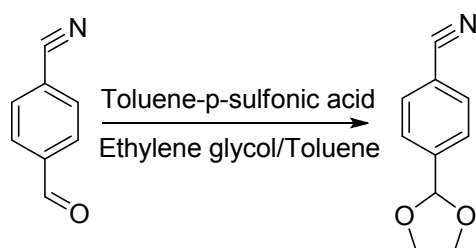

To a solution of 4-cyanobenzaldehyde (15.0 g, 114.4 mmol) in toluene (300 mL) was added ethylene glycol (11.5 mL, 206 mmol) followed by pyridinium-*p*-toluene-sulfonic acid (1.5 g, 8.7 mmol) and then heated at 130 °C in Dean-Stark apparatus with continuous exclusion of water. After the formation of H<sub>2</sub>O cease. Cooled the reaction solution to room temperature. The solution was washed with saturated aqueous NaHCO<sub>3</sub> (100 mL) and brine (50 mL × 3). The organic layer was dried over anhydrous MgSO<sub>4</sub>, and then concentrated via rotary evaporation. The raw product was purified by column chromatography (silica gel; petroleum/ethyl acetate, 1/4, v/v)

to get 4-(1,3-dioxolan-2-yl)benzotrile as an off white solid. (Yield: 18.53 g, 92%).

$^1\text{H}$  NMR (500 MHz, Chloroform-d)  $\delta$  7.62 (ddt,  $J = 41.5, 7.4, 3.0$  Hz, 4H), 5.89-5.77 (m, 1H), 4.15-3.98 (m, 4H).

## S2. Supporting Figure

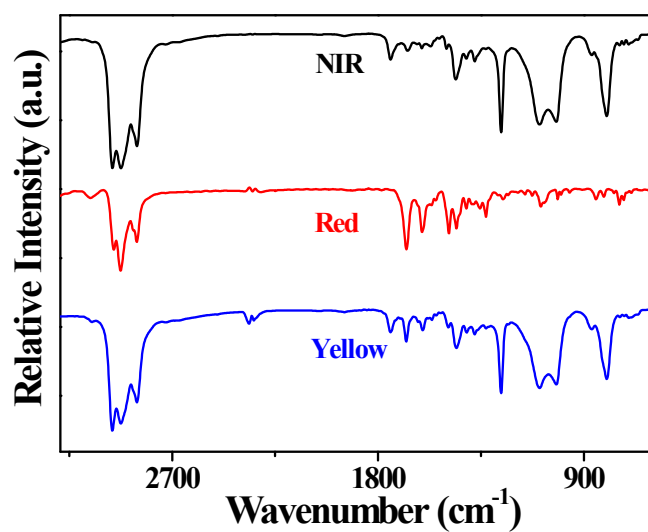

Figure S1. FTIR spectra of CODPP solids with different emission colors.

$^1\text{H}$  NMR and  $^{13}\text{C}$  spectra of the compounds as follows

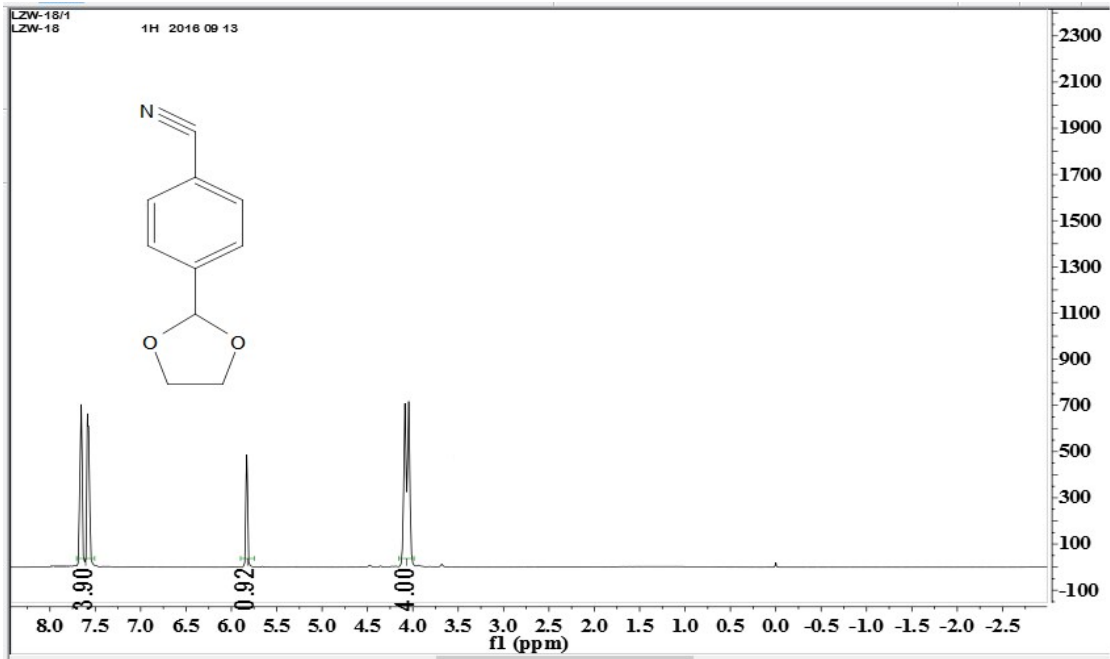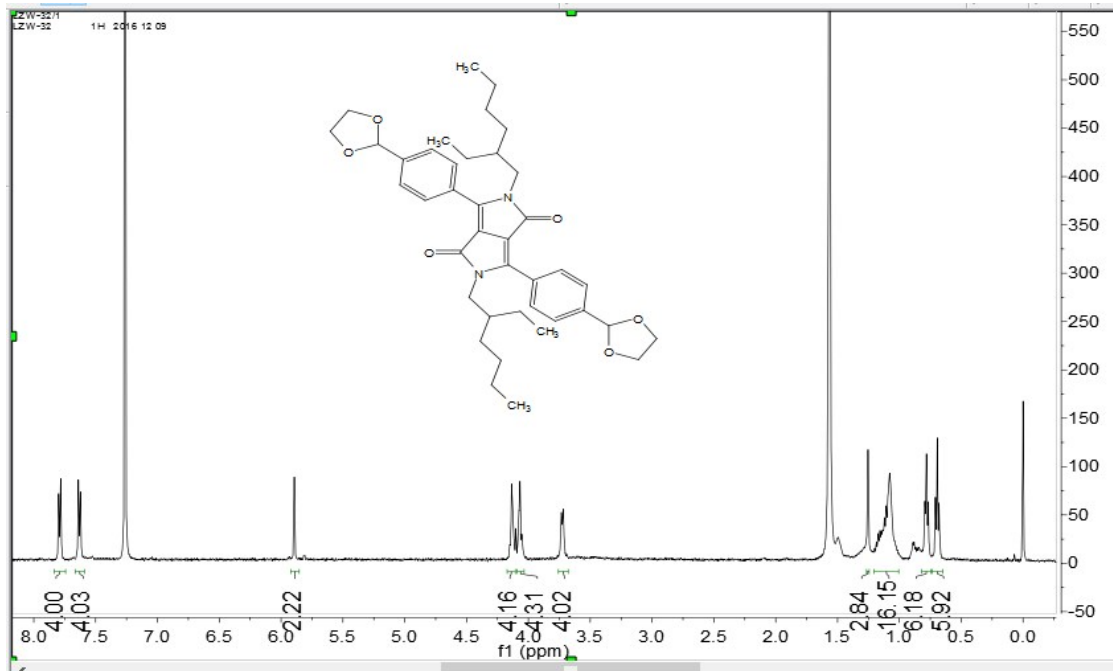

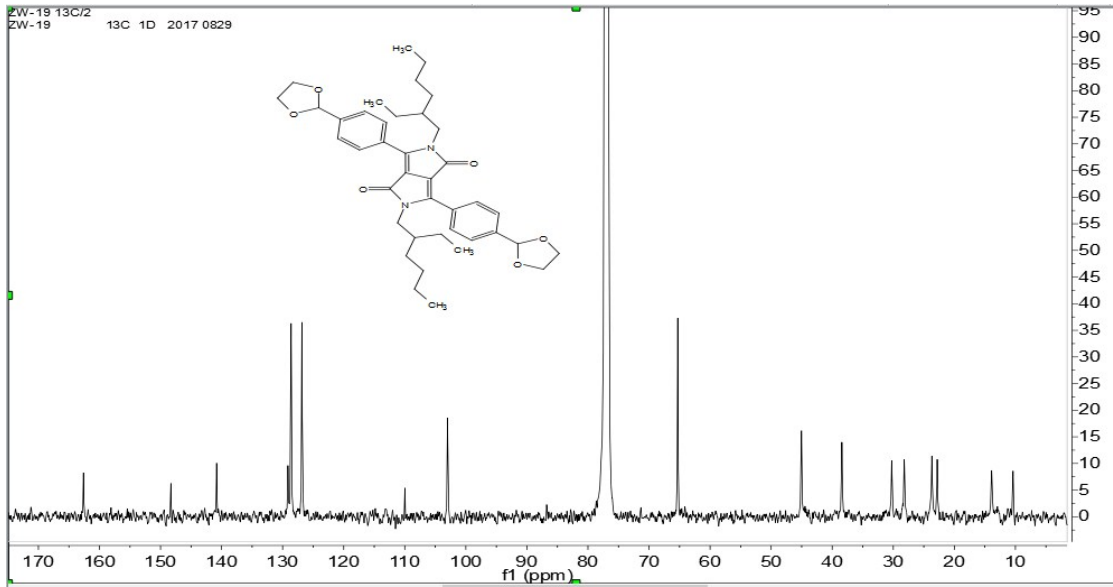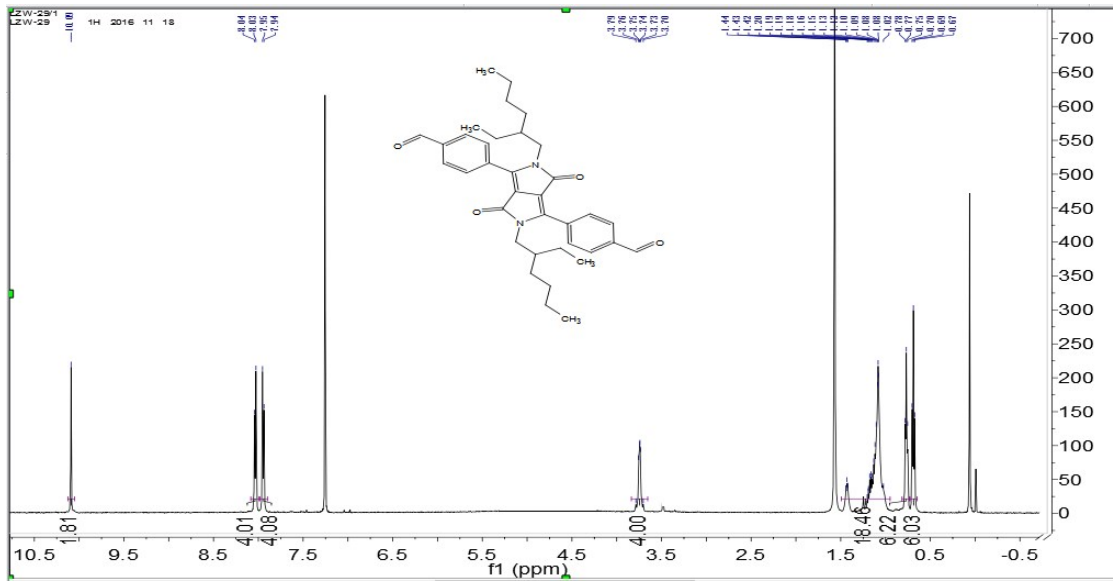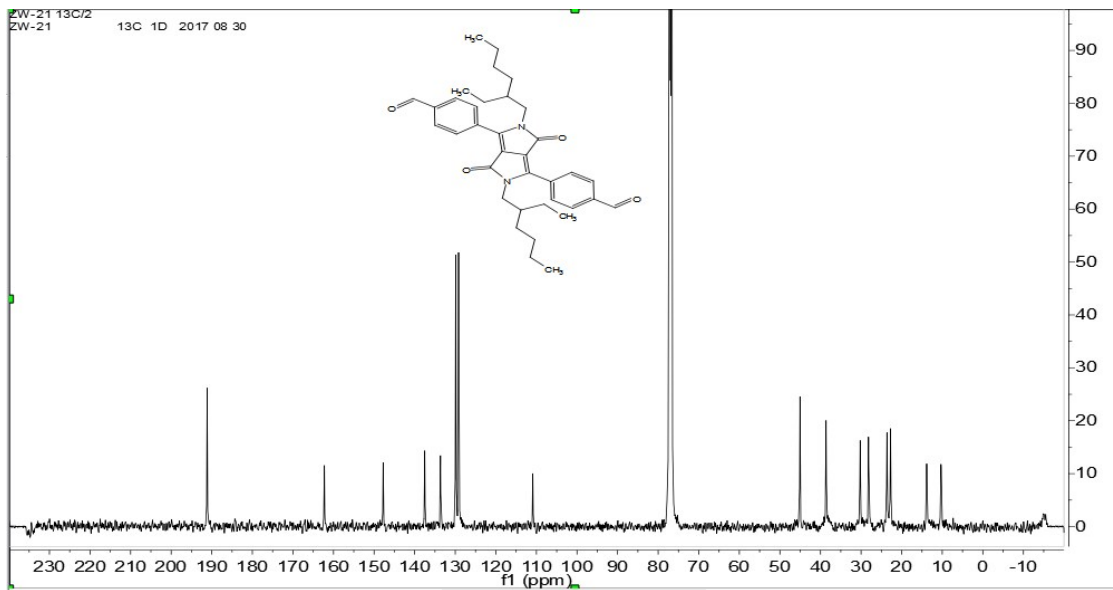

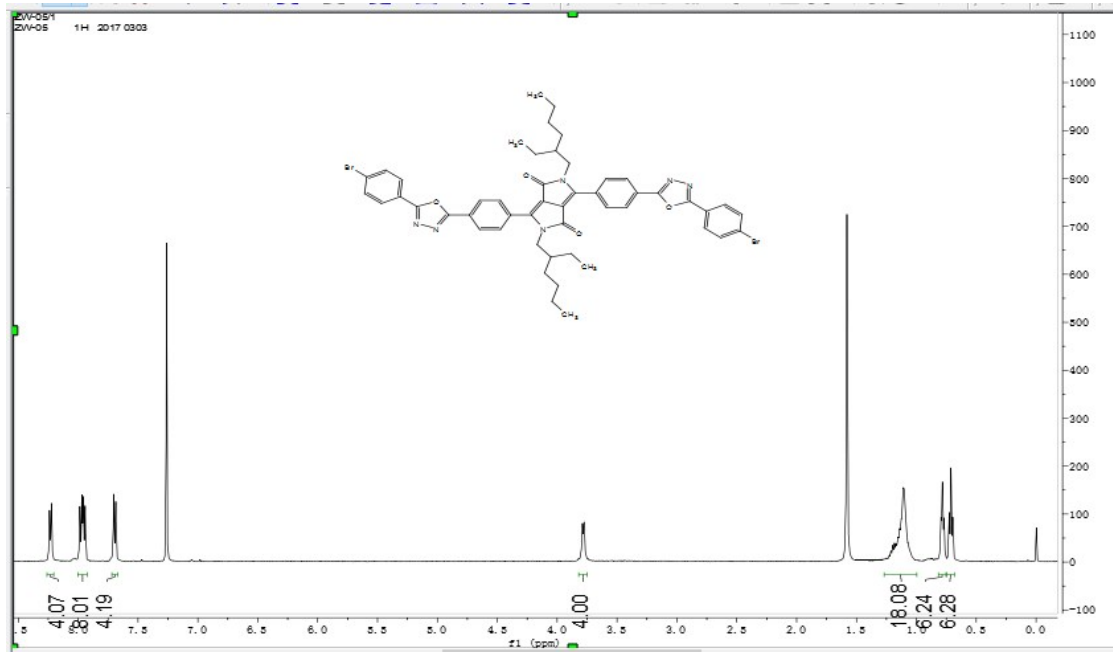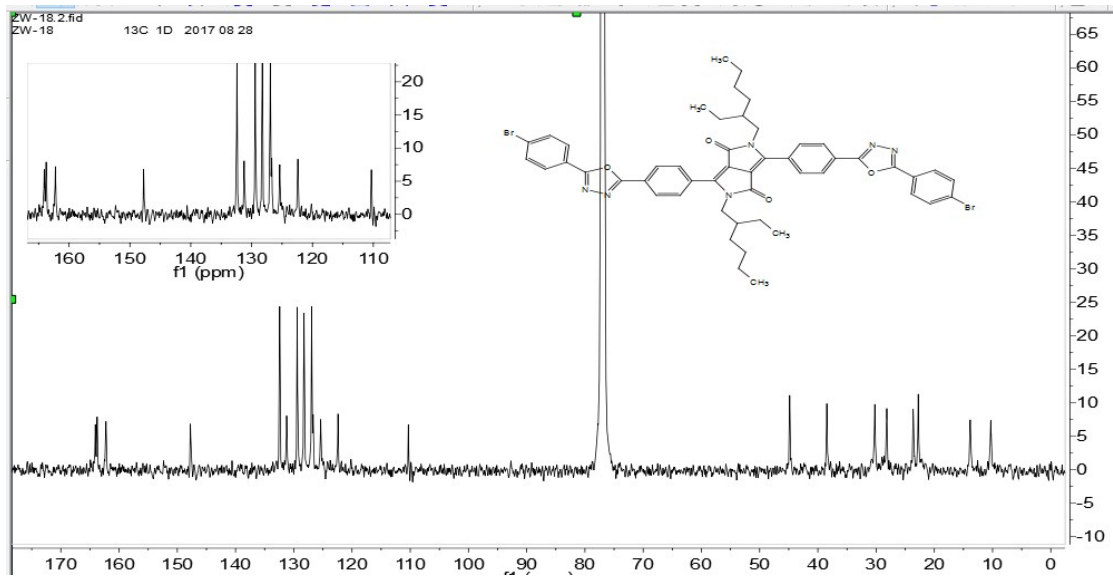

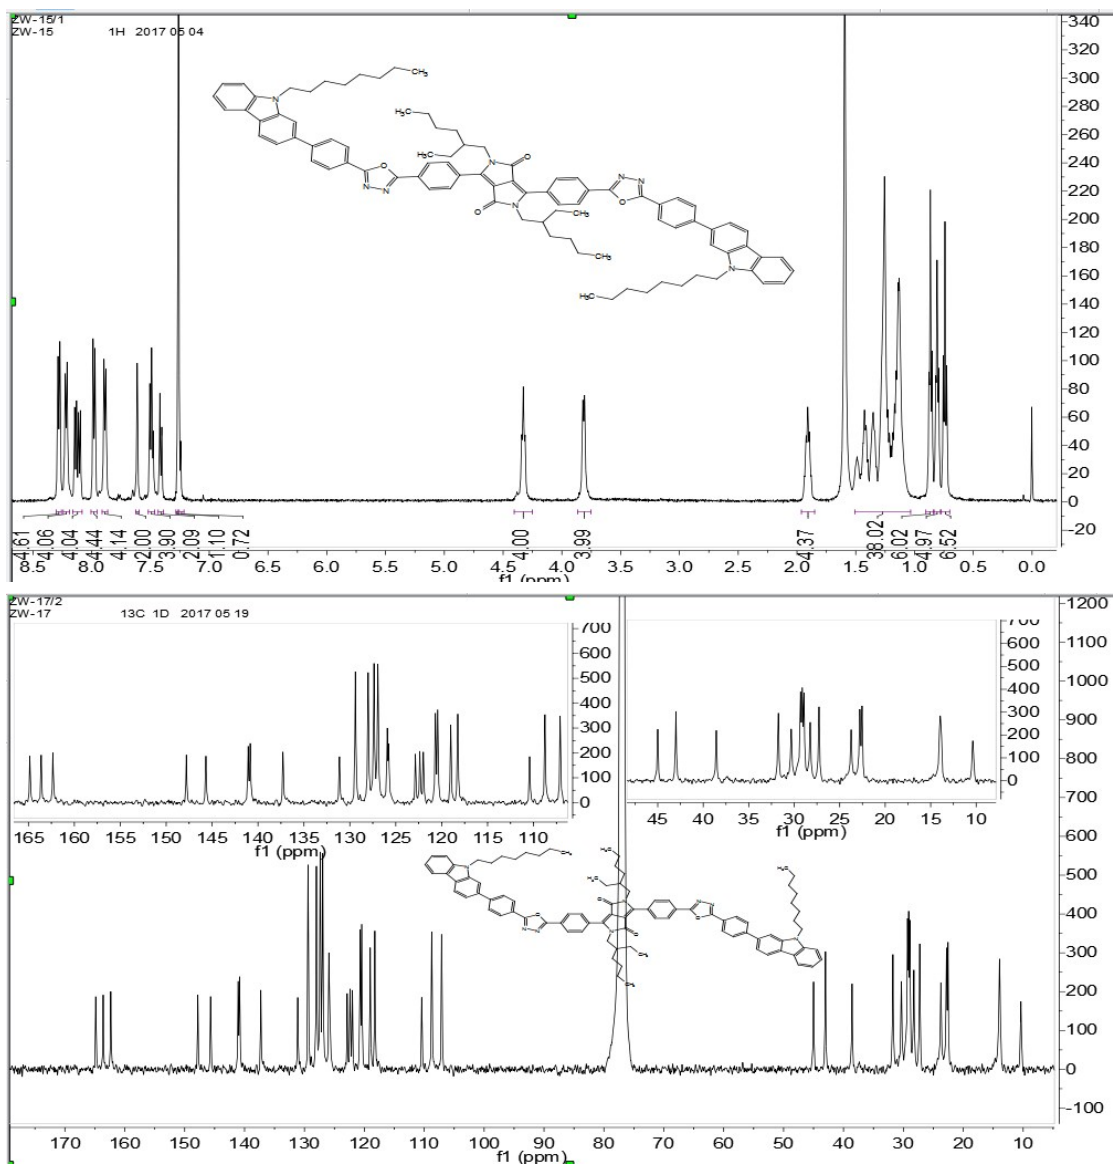

### SI-3. Supporting Tables

Table S1 The solution fluorescence quantum yields (%) and the molar extinction coefficients ( $M^{-1} cm^{-1}$ ) of CODPP in different solvents.

| Solvents                          | PhMe  | CHCl <sub>3</sub> | THF   | DMF   |
|-----------------------------------|-------|-------------------|-------|-------|
| Fluorescence quantum yield (%)    | 74.8  | 75.1              | 72.3  | 67.0  |
| The molar extinction coefficients | 54000 | 50300             | 59000 | 52700 |

Table S2 The solid fluorescence quantum yields (%) of CODPP in different states.

| States | Pristine | Ground | Annealed |
|--------|----------|--------|----------|
| CODPP  | 15%      | 46%    | 95%      |
